# Supplementary material for: Lignosulfonate in situ-modified reduced graphene oxide biosensors for the electrochemical detection of dopamine
Source: PubMed Central journal article supplement — RSC Adv. 2022 Oct 31;12(48):31083–90. doi: 10.1039/d2ra05635f (PMC9620500; doi:10.1039/d2ra05635f), 2022-10-31
Supplement: RA-012-D2RA05635F-s001.pdf [file RA-012-D2RA05635F-s001.pdf]

## **Supporting materials**

### **Lignosulfonate situ-modified reduced graphene oxide biosensors for electrochemical detection of dopamine**

Ying Yuan, Shuangxin Wang, Ping Wu, Tongqi Yuan and Xiluan Wang\*

Beijing Key Laboratory of Lignocellulosic Chemistry, Beijing Forestry University,  
Beijing, 100083, P. R. China.

\*Corresponding author: Tel: +86-10-62336903; Fax: +86-10-62336903

E-mail address: wangxiluan@bjfu.edu.cn

## 1.Preparation of graphene oxide (GO)

GO was prepared by the oxidation of natural graphite powder (325 meshes) according to a modified Hummers' method (Hummers, 1958). Graphite powder (3.0 g) and sodium nitrate (1.5 g) were added to concentrated H<sub>2</sub>SO<sub>4</sub> (70 mL) under stirring in an ice bath. KMnO<sub>4</sub> (9.0 g) was added slowly to keep the temperature of the suspension lower than 5 °C. Successively, the reaction system was transferred to a 35 ± 5 °C bath and vigorously stirred for about 0.5 h. Then, 150 mL water was added, and the solution was stirred for 15 minutes at 90 ± 5 °C. Additional 500 mL water was added and followed by a slow addition of 15 mL H<sub>2</sub>O<sub>2</sub> (30%), turning the color of the solution from dark brown to yellow. The mixture was filtered and washed with 1:10 HCl aqueous solution (250 mL) to remove metal ions, the resulting solid was dried in air and diluted to 600 mL, making a graphite oxide aqueous dispersion, the obtained dispersion was treated in ultrasound for 30 minutes, and then centrifuged at 4,000 rpm for 30 minutes to remove the graphite and graphite oxide residue in the lower layer. Finally, it was purified by dialysis for one week using a membrane with the molar mass cut off of 8,000 to 14,000 g mol<sup>-1</sup> to remove the remaining metal species.

## 2. Electrochemical measurements

All electrochemical measurements were performed on an electrochemical workstation (CHI-760E, Austin, Texas) with a standard three-electrode system. A GCE (3 mm in diameter) deposited with the LS-rGO as the modifier, platinum electrode, and saturated calomel electrode were selected as the working electrode, counter electrode, and reference electrode, respectively. The detection is directly conducted in PBS solutions containing different DA, which ~~The sample solutions~~ were purged with nitrogen for about 30 min to remove oxygen prior to the beginning of a series of experiments. The specific parameter settings are as follows: Cyclic voltammetry was carried out at a serious of scan rate from  $50 \text{ mV s}^{-1}$  to  $500 \text{ mV s}^{-1}$ , and the quiet time is 5 s, in the potential range of  $-0.2 \text{ V}$  to  $0.4 \text{ V}$ . All tests were performed in  $0.1 \text{ mol L}^{-1}$  phosphate buffered saline (PBS) solution with a pH value from 4.0 to 8.0 at  $25 \text{ }^\circ\text{C}$ . Electrochemical impedance spectroscopy (EIS) was performed in  $5 \text{ mM } [\text{Fe}(\text{CN})_6]^{4-/3-}$  and  $0.1 \text{ M KCl}$  solution, at an amplitude of  $5 \text{ mV}$  in the frequency range between  $0.1 \text{ Hz}$  and  $1000 \text{ kHz}$ .

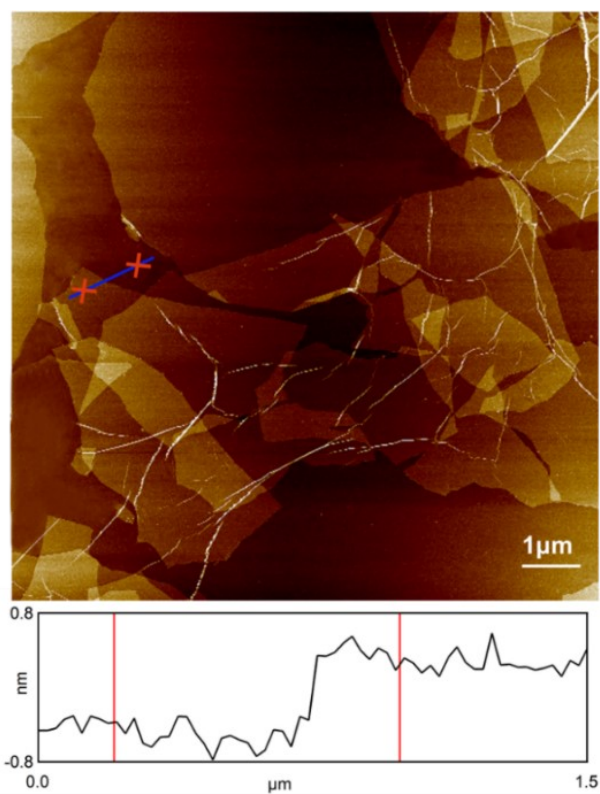

**Figure S1.** The atomic force microscope (AFM) image and height profile of GO sheets on a freshly cleaved mica surface.

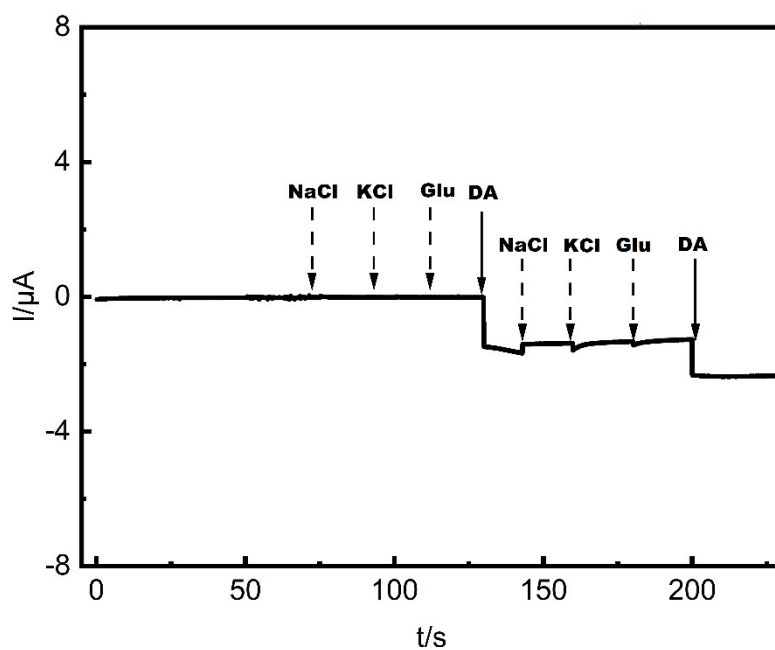

**Figure S2.**  $i-t$  curve of LS-rGO sensor, for the addition of 1 μM NaCl, KCl, Glucose, and 5 μM NaCl, KCl, Glucose respectively at the potential of 0.05 V.

**Table S1.** Comparison between electrochemical biosensor and other analytical methods

| Detection method                       | advantage                                                                                                                                | disadvantage                                                                                                                             |
|----------------------------------------|------------------------------------------------------------------------------------------------------------------------------------------|------------------------------------------------------------------------------------------------------------------------------------------|
| Fluorescence spectrometry              | Simple, fast and sensitive operation                                                                                                     | fluorescence quenching effect and scattered light interference;<br>The DA detection in complex systems is difficult;                     |
| High performance liquid chromatography | Integrating of separation, qualitative analysis and quantitative analysis;<br>Separation and analysis of multiple coexisting substances; | Expensive instrument price;<br>High daily maintenance and analysis cost;<br>Long analysis time;                                          |
| Capillary electrophoresis              | Short separation time; high separation efficiency; small system volume and easy integration of different operation units;                | Weak separation capacity; high requirements for PH value; poor reproducibility;                                                          |
| Colorimetry                            | Fast color rendering; visualization;                                                                                                     | Low sensitivity; High purity tested component; Further analysis with other instruments;                                                  |
| Electrochemical analysis method        | Simple operation; high sensitivity; good selectivity; In vivo analysis;                                                                  | The stability needs to be improved; Electrode modification materials need to be developed to improve detection accuracy and sensitivity; |

**Table S2.** Elemental analysis of the rGO and LS-rGO

| Sample | C     | O     | N    | S    | O/C   |
|--------|-------|-------|------|------|-------|
| rGO    | 84.30 | 12.36 | 3.34 | 0    | 14.66 |
| LS-rGO | 77.28 | 19.41 | 2.42 | 0.89 | 25.12 |

**Table S3.** Comparison of dopamine detection performance of modified electrodes in different literatures

| Materials                               | Liner range( $\mu\text{m}$ ) | Detection limit ( $\mu\text{M}$ ) | Refs.     |
|-----------------------------------------|------------------------------|-----------------------------------|-----------|
| TiO <sub>2</sub> /Gr/GCE                | 5–200                        | 2                                 | 1         |
| Gr/Chitosan/GCE                         | 4.0–100                      | 2.64                              | 2         |
| Au/Cu <sub>2</sub> O/rGO/GCE            | 10–90                        | 3.9                               | 3         |
| PG/GCE                                  | 5–710                        | 2                                 | 4         |
| PANI-H <sub>2</sub> SO <sub>4</sub> @Au | 10–100                       | 6.7                               | 5         |
| CNF-RGO                                 | 10–60                        | 1.16                              | 6         |
| PANI-GO/GCE                             | 2–18                         | 2.0                               | 7         |
| Ni/rGO-oxCNF                            | 10–16                        | 1.64                              | 8         |
| rGO/Au nanoparticles                    | 1–60                         | 0.38                              | 9         |
| GEF/CFE                                 | 0.7–45.21                    | 1.91                              | 10        |
| BAMB/Co(OH) <sub>2</sub> /GO/GCE        | 3–20,25–100                  | 0.4                               | 11        |
| LS-rGO/GCE                              | 1.08–100                     | 1.08                              | This work |

**Table S4.** The ionic states of DA in different pH solutions

|         | H <sub>3</sub> DA <sup>+</sup> (%) | H <sub>2</sub> DA <sup>+</sup> (%) | HAD <sup>-</sup> (%) | DA <sup>2-</sup> (%) |
|---------|------------------------------------|------------------------------------|----------------------|----------------------|
| pH 4.7  | 100                                | 0                                  | 0                    | 0                    |
| pH 7.0  | 99                                 | 1                                  | 0                    | 0                    |
| pH 9.2  | 38.7                               | 58.5                               | 2.8                  | 0                    |
| pH 11.7 | 0                                  | 5.1                                | 81.8                 | 13.1                 |
| pH 14.6 | 0                                  | 0                                  | 0.8                  | 99.2                 |

## References

- 1 Y. Fan, H. Lu, J. Liu, C. Yang, Q. Jing, Y. Zhang, X. Yang and K. Huang, *Colloid. Surface. B*, 2011, **83**, 78-82.
- 2 Y. Kim, S. Bong, Y. Kang, Y. Yang, R.K. Mahajan, J.S. Kim and H. Kim, *Biosens. Bioelectron.*, 2010, **25**, 2366-2369.
- 3 T.K. Aparna, R. Sivasubramanian and M.A. Dar, *J. Alloy. Compd.*, 2018, **741**, 1130-1141.
- 4 S. Qi, B. Zhao, H. Tang and X. Jiang, *Electrochim. Acta*, 2015, **161**, 395-402.
- 5 S. Mahalakshmi and V. Sridevi, *Mater. Chem. Phys.*, 2019, **235**.
- 6 K.P. Aryal and H.K. Jeong, *Chem. Phys. Lett.*, 2020, **739**.
- 7 P. Manivel, M. Dhakshnamoorthy, A. Balamurugan, N. Ponpandian, D. Mangalaraj and C. Viswanathan, *Rsc Adv.*, 2013, **3**, 14428-14437.
- 8 K.P. Aryal and H.K. Jeong, *Chem. Phys. Lett.*, 2020, **761**.
- 9 S. Liu, J. Yan, G. He, D. Zhong, J. Chen, L. Shi, X. Zhou and H. Jiang, *J. Electroanal. Chem.*, 2012, **672**, 40-44.
- 10 J. Du, R. Yue, F. Ren, Z. Yao, F. Jiang, P. Yang and Y. Du, *Biosens. Bioelectron.*, 2014, **53**, 220-224.
- 11 A. Ejaz, Y. Joo and S. Jeon, *Sensor. Actuat. B-Chem.*, 2017, **240**, 297-307.
